# Supplementary material
Source: Research Square preprint supplement (doi:10.21203/rs.3.rs-9915229/v1)
Supplement: Supplementary file 4 [file af8a3190cf2d91b96ed7dc3a.pdf]

# BioBladder cohorts

---

Patient study ID  
(this is the unique patient ID in BioBladder)

\_\_\_\_\_

---

Cohort Pat cohort number Inf. consent date

First cohort \_\_\_\_\_

Second cohort \_\_\_\_\_

Third cohort \_\_\_\_\_

Fourth cohort \_\_\_\_\_

Fifth cohort \_\_\_\_\_

# Baseline

This patient has cohort number: [baseline\_diagnosti\_arm\_1][kohortnr1]

Centre

- Karolinska
- Jönköping
- Uppsala
- Gävle
- Umeå
- Västerås
- Östersund

Sex

- Male
- Female

Birth date

\_\_\_\_\_

Co-morbidities at baseline

- No
- HT
- Asthma
- Renal failure
- Hyperlipidemia
- Heart failure
- Stroke
- Rheuma
- Arthritis
- COPD
- TIA
- IBD
- Psychiatric disease
- DM1
- DM2
- Coronary disease
- Arrhythmica
- Hypothyreoidism
- Atrial fibrillation
- Deep vein thrombosis
- Pulmonary embolism
- Arthrosis
- Other

-If Other, please specify

\_\_\_\_\_

Smoking status

- Non-smoker
- Smoker
- Former smoker
- Not known

# Diagnostic Data

**This patient has cohort number: [baseline\_diagnosti\_arm\_1][kohortnr1]**

Date of first diagnosis(including Ta, Tis, CIS)

\_\_\_\_\_

PAD number, first diagnosis

\_\_\_\_\_

Clinical stage at diagnosis

T \_\_\_\_ N \_\_\_\_ M \_\_\_\_ G \_\_\_\_

CIS component at diagnosis

- No  
 Yes  
 Not known

Date of invasive disease (incl T1)

\_\_\_\_\_

PAD number (invasive disease)

\_\_\_\_\_

Primary tumor location

- Bladder  
 Urethra  
 Ureter  
 Renal pelvis  
 Urachus

Tumour histology

- Pure adenocarcinoma  
 Pure small cell  
 Pure SCC  
 Pure UC  
 Variant subtype of UC (WHO)  
 Not known

- If Variant subtype of UC, please specify

- Infiltrating urothelial carcinoma with squamous differentiation  
 Infiltrating urothelial carcinoma with glandular differentiation  
 Poorly differentiated carcinoma  
 Giant cell  
 Sarcomatoid  
 Lymphoepithelioma-like  
 Micropapillary  
 Nested, including large nested  
 Microcystic  
 Plasmacytoid/signet ring/diffuse  
 Lipid-rich  
 Clear cell  
 Small cell neuroendocrine carcinoma  
 Other  
 Not known

- If Other, please specify

\_\_\_\_\_

---

PD-L1 tested at any time?  No  
 Yes  
 Not known

---

- If Yes, PD-L1 result  Negative  
 Positive

---

PD-L1 Clone Tested Result Date PAD no.  
22C3 \_\_\_\_\_  
SP142 \_\_\_\_\_  
SP263 \_\_\_\_\_  
28-8 \_\_\_\_\_  
If other clone tested, name  
\_\_\_\_\_

---

FGFR alterations tested at any time?  No  
 Yes  
 Not known

---

FGFR test Tested Result Date Type of alteration Type of test PAD no.  
Blood \_\_\_\_\_  
Tissue \_\_\_\_\_

---

Locally advanced or metastatic disease at initial diagnosis (T4b or N+ or M+)  No  
 Yes  
 Not known

# Curative Treatment

**This patient has cohort number: [baseline\_diagnosti\_arm\_1][kohortnr1]**

Type of curative intent treatment

- None
- Bladder instillation
- Cystectomy
- Nephroureterectomy
- Curative intent radiotherapy
- Long term control intent radiotherapy
- N/K

## Instillation

- Instillation, type of treatment

- BCG
- Mytomicin
- Docetaxel/gemzar
- Other
- Not known

- If BCG, recurrence during or after BCG

- Refractory
- Recurrence after maintenance with BCG
- Non-responsive to BCG
- N/K

- If Other, specify

\_\_\_\_\_

- Number of infusions (free text)

\_\_\_\_\_

- Start date \_\_\_\_\_ Stop date \_\_\_\_\_

- Main reason for stopping

- Planned stop
- Progressive disease
- Toxicity
- Patient choice
- Other
- Not known

- If Other, please specify

\_\_\_\_\_

- If Toxicity, type of toxicity and CTC grade

\_\_\_\_\_

- If Other, please specify

\_\_\_\_\_

Progressive disease after instillation?

- No
- Yes
- N/K

- If Progressive disease, date of progression

\_\_\_\_\_

- If Yes, confirmed by pathology

- No  
 Yes  
 N/K

- If Yes, biopsy date

\_\_\_\_\_

If Yes, PAD number

\_\_\_\_\_

- Rechallenge BCG

- No  
 Yes  
 N/K

- Other lines infusion

- No  
 Yes  
 N/K

- If Yes, type

- Mitomycin  
 Gemzar/docetaxel  
 Other  
 Not known

- If Other, specify

\_\_\_\_\_

### Cystectomy or nephroureterectomy

Date of surgery

\_\_\_\_\_

PAD number

\_\_\_\_\_

pT

- T0  
 Tis  
 Ta  
 T1a  
 T1b  
 T2  
 T3  
 T4a  
 T4b  
 N/K

pN

- N0  
 N1  
 N2  
 N3  
 Nx  
 N/K

Tumour histology

- Pure adenocarcinoma  
 Pure small cell  
 Pure SCC  
 Pure UC  
 Variant subtype of UC (WHO)  
 Not known

- If Variant subtype of UC, please specify

- Infiltrating urothelial carcinoma with squamous differentiation
- Infiltrating urothelial carcinoma with glandular differentiation
- Poorly differentiated carcinoma
- Giant cell
- Sarcomatoid
- Lymphoepithelioma-like
- Micropapillary
- Nested, including large nested
- Microcystic
- Plasmacytoid/signet ring/diffuse
- Lipid-rich
- Clear cell
- Small cell neuroendocrine carcinoma
- Other
- Not known

- If Other, please specify

\_\_\_\_\_

Progressive disease after  
cystectomy/nephroureterectomy

- No
- Yes
- N/K

- If Progressive disease, first date of imaging  
confirming progress

\_\_\_\_\_

- Date when clinician decides on clinical progress (in  
case of no confirming imaging)

\_\_\_\_\_

Progression confirmed by pathology

- No
- Yes
- N/K

- If Yes, biopsy date

\_\_\_\_\_

- If Yes, PAD number

\_\_\_\_\_

- If Progressive disease, any new metastatic organs?

- No
- Yes
- N/K

- If new metastatic organ(s), please specify

- T4B
- Regional lymph node (N+)
- Distant metastasis lymph node (M1a)
- Lung
- Liver
- Bone
- Adrenal gland
- Brain
- Pleura
- Peritoneal carcinomatosis
- Soft tissue
- Skin/subcutaneous tissue
- Pancreas
- Intramuscular
- Pericardium
- Other location
- Not known

- If Other location, please specify

\_\_\_\_\_

### If Radiotherapy

- Total dose planned (Gy) (free text)

\_\_\_\_\_

- Total dose given (Gy)

\_\_\_\_\_

- Number of fractions given

\_\_\_\_\_

- Start date \_\_\_\_\_ Stop date \_\_\_\_\_

- Main reason for stopping radiotherapy

- Planned
- Progression
- Toxicity
- Patient choice
- Other
- Not known

- If Toxicity, specify tox and CTC grade

\_\_\_\_\_

- If Other, specify

\_\_\_\_\_

- Progressive disease after radiotherapy?

- No
- Yes
- N/K

- If Progressive disease, first date of imaging confirming progress

\_\_\_\_\_

- Date when clinician decides on clinical progress (in case of no confirming imaging)

\_\_\_\_\_

- If Progressive disease, confirmed by pathology

- No  
 Yes  
 N/K

- If Yes, biopsy date

\_\_\_\_\_

- If Yes, PAD number

\_\_\_\_\_

- If Progressive disease, any new metastatic organs?

- No  
 Yes  
 N/K

- If new metastatic organ(s), please specify

- T4B  
 Regional lymph node (N+)  
 Distant metastasis lymph node (M1a)  
 Lung  
 Liver  
 Bone  
 Adrenal gland  
 Brain  
 Pleura  
 Peritoneal carcinomatosis  
 Soft tissue  
 Skin/subcutaneous tissue  
 Pancreas  
 Intramuscular  
 Pericardium  
 Other location  
 Not known

- If Other location, please specify

\_\_\_\_\_

Radiotherapy within a clinical trial

- No  
 Yes  
 Not known

- If Yes, specify trial name and EU-CT or NCT number

\_\_\_\_\_

### Concomitant chemotherapy

Concomitant chemotherapy

- No  
 Yes  
 N/K

- If Yes, type of treatment

- FUMI  
 Gemzar  
 Other  
 Not known

- If Other, specify

\_\_\_\_\_

- Performance status at start

0  
 1  
 2  
 3  
 4  
 N/K

- Start date \_\_\_\_\_ Stop date  
 (day 1 last cycle) \_\_\_\_\_

- Number of cycles given \_\_\_\_\_

- Main reason for stopping chemotherapy

Planned  
 Progression  
 Toxicity  
 Patient choice  
 Other  
 Not known

- If Toxicity, specify tox and CTC grade \_\_\_\_\_

- If Other, specify \_\_\_\_\_

Concomitant chemotherapy within a clinical trial

No  
 Yes  
 N/K

- If Yes, specify trial name and EU-CT or NCT number \_\_\_\_\_

### Pre-operative and adjuvant systemic therapy

Pre-operative systemic therapy

No  
 Yes  
 N/K

- If Yes, neoadjuvant or induction

Neoadjuvant  
 Induction  
 Not known

- If Yes, type of treatment

Cisplatin-Gemzar  
 MVAC  
 Other  
 Not known

- If Other, specify \_\_\_\_\_

- Performance status at start of therapy

0  
 1  
 2  
 3  
 4  
 N/K

---

- Start date \_\_\_\_\_ Stop date \_\_\_\_\_  
(day 1 last cycle) \_\_\_\_\_

---

- Number of cycles given \_\_\_\_\_

---

- Main reason for stopping

- Planned
- Progression
- Toxicity
- Patient choice
- Other
- Not known

---

- If Toxicity, specify tox and CTC grade \_\_\_\_\_

---

- If Other, specify \_\_\_\_\_

---

Progressive disease after preoperative systemic treatment?

- No
- Yes
- N/K

---

- If Progression, first date of imaging confirming progress \_\_\_\_\_

---

- Date when clinician decides on clinical progress (in case of no confirming imaging) \_\_\_\_\_

---

- Progression confirmed by pathology?

- No
- Yes
- N/K

---

- If Yes, biopsy date \_\_\_\_\_

---

- If Yes, PAD number \_\_\_\_\_

---

- If Progressive disease, any new metastatic organs?

- No
- Yes
- N/K

- If new metastatic organ(s), please specify

- T4B
- Regional lymph node (N+)
- Distant metastasis lymph node (M1a)
- Lung
- Liver
- Bone
- Adrenal gland
- Brain
- Pleura
- Peritoneal carcinomatosis
- Soft tissue
- Skin/subcutaneous tissue
- Pancreas
- Intramuscular
- Pericardium
- Other location
- Not known

- If Other location, please specify \_\_\_\_\_

- Pre-operative therapy within clinical trial

- No
- Yes
- N/K

- If Yes, study name and EU-CT or NCT no. \_\_\_\_\_

Adjuvant therapy

- No
- Yes
- N/K

- If Yes, type of treatment

- Cisplatin-Gemzar
- Carboplatin-Gemzar
- Nivolumab
- Pembrolizumab
- Other
- Not known

- If Other, specify \_\_\_\_\_

- Performance status at start

- 0
- 1
- 2
- 3
- 4
- N/K

- Start date \_\_\_\_\_ Stop date  
(day 1 last cycle) \_\_\_\_\_

- Number of cycles given \_\_\_\_\_

- Main reason for stopping

Planned  
 Progression  
 Toxicity  
 Patient choice  
 Other  
 Not known

- If Toxicity, specify tox and CTC grade

\_\_\_\_\_

- If Other, specify

\_\_\_\_\_

Progressive disease after adjuvant treatment?

No  
 Yes  
 N/K

- If Progression, first date of imaging confirming progress

\_\_\_\_\_

- Date when clinician decides on clinical progress (in case of no confirming imaging)

\_\_\_\_\_

- Progression confirmed by pathology?

No  
 Yes  
 /N/K

- If Yes, biopsy date

\_\_\_\_\_

- If Yes, PAD number

\_\_\_\_\_

- If Progressive disease, any new metastatic organs?

No  
 Yes  
 /N/K

- If new metastatic organ(s), please specify

T4B  
 Regional lymph node (N+)  
 Distant metastasis lymph node (M1a)  
 Lung  
 Liver  
 Bone  
 Adrenal gland  
 Brain  
 Pleura  
 Peritoneal carcinomatosis  
 Soft tissue  
 Skin/subcutaneous tissue  
 Pancreas  
 Intramuscular  
 Pericardium  
 Other location  
 Not known

- If Other location, please specify

\_\_\_\_\_

---

- Adjuvant therapy within clinical trial

- No
- Yes
- N/K

---

- If Yes, study name and EU-CT or NCT no.

---

## Locally advanced and/or metastatic disease

**This patient has cohort number(s): [baseline\_diagnosti\_arm\_1][kohortnr1], [baseline\_diagnosti\_arm\_2][kohortnr2], [baseline\_diagnosti\_arm\_3][kohortnr3]**

Locally advanced and/or metastatic disease  
(incl T4b, N1, M1)  No  
 Yes  
 Not known

- If Yes, location(s)  T4B  
 Regional lymph node (N+)  
 Distant metastasis lymph node (M1a)  
 Lung  
 Liver  
 Bone  
 Adrenal gland  
 Brain  
 Pleura  
 Peritoneal carcinomatosis  
 Soft tissue  
 Skin/subcutaneous tissue  
 Pancreas  
 Intramuscular  
 Pericardium  
 Other location  
 Not known

- If Other location, please specify \_\_\_\_\_

- If Yes, date of first radiology with locally advanced or metastatic disease \_\_\_\_\_

- If Yes, pathologically confirmed locally advanced or metastatic disease  No  
 Yes  
 Not known

- If Yes, biopsy date \_\_\_\_\_

- If Yes, PAD number \_\_\_\_\_

### 1st Line therapy

Started first line systemic therapy  No  
 Yes  
 Not known

- If No, reason \_\_\_\_\_

- If Yes, treatment initiated as induction  No  
 Yes  
 Not known

- 1st line systemic therapy type
- EV + pembrolizumab
  - MVAC
  - Cisplatin + gemcitabine
  - Carboplatin + gemcitabine
  - Pembrolizumab
  - Atezolizumab
  - Gemcitabine monotherapy
  - Carboplatin + etoposide
  - Cisplatin + etoposide
  - Cisplatin + gemcitabine + nivolumab (incl switch to carboplatin+gemcitabine+nivolumab)
  - Other
  - Not known

- If Other, specify

\_\_\_\_\_

- Performance status at start of therapy
- 0
  - 1
  - 2
  - 3
  - 4
  - N/K

- Start date \_\_\_\_\_ Stop date  
(Day 1 last cycle)

\_\_\_\_\_

- Number of cycles given

(If combination treatment with immunotherapy is used, this refers to the number of cycles in combination. For maintenance, see below.)

- Best response
- CR
  - PR
  - SD
  - PD
  - NE
  - Not known

- Main reason for stopping
- Planned stop
  - Progressive disease
  - Toxicity
  - Patient choice
  - Other
  - Not known

- If Toxicity, type of toxicity (tox and CTC grade)

\_\_\_\_\_

- If Other, please specify

\_\_\_\_\_

- Progressive disease after 1st line treatment?
- No
  - Yes
  - N/K

- If Progressive disease, first date of imaging confirming progress

\_\_\_\_\_

- Date when clinician decides on clinical progress (in case of no confirming imaging)

\_\_\_\_\_

Progression confirmed by pathology

- No  
 Yes  
 N/K

- If Yes, biopsy date

\_\_\_\_\_

- If Yes, PAD number

\_\_\_\_\_

- If Progressive disease, any new metastatic organs?

- No  
 Yes  
 N/K

- If new metastatic organ(s), please specify

- T4B  
 Regional lymph node (N+)  
 Distant metastasis lymph node (M1a)  
 Lung  
 Liver  
 Bone  
 Adrenal gland  
 Brain  
 Pleura  
 Peritoneal carcinomatosis  
 Soft tissue  
 Skin/subcutaneous tissue  
 Pancreas  
 Intramuscular  
 Pericardium  
 Other location  
 Not known

- If Other location, please specify

\_\_\_\_\_

- Therapy within clinical trial

- No  
 Yes  
 N/K

- If Yes, trial name and EU-CT or NCT no.

\_\_\_\_\_

### 1 line therapy baseline laboratory

CRP

\_\_\_\_\_

B-leukocyter

\_\_\_\_\_

B-Neutrophiles

\_\_\_\_\_

---

B-lymfocytes

---

---

Hb

---

---

ASAT

---

---

ALAT

---

---

ALP

---

---

P-LD

---

---

Glukos

---

---

eGFR(cystC), relative

---

---

eGFR(krea), relative

---

---

P-Albumin

---

---

Calcium

---

---

Fosfat

---

---

TSH

---

---

T4

---

---

T3

---

---

Troponin T

---

---

proBNP

---

---

Kortisol

---

**Maintenance therapy**

Maintenance therapy given

- No  
 Yes  
 N/K

- If Yes, regimen

- Avelumab  
 Nivolumab (within platinum + gemcitabine + nivolumab regimen)  
 Pembrolizumab (within ev + pembrolizumab regimen)  
 Other  
 Not known

- If Other, please specify

\_\_\_\_\_

- Performance status at therapy start

- 0  
 1  
 2  
 3  
 4  
 N/K

- Start date \_\_\_\_ Stop date  
(Day 1 last cycle) \_\_\_\_

- Number of cycles given

\_\_\_\_\_

- Best response

- CR  
 PR  
 SD  
 PD  
 NE  
 Not known

- Main reason for stopping

- Planned stop  
 Progressive disease  
 Toxicity  
 Patient's choice  
 Other  
 Not known

- If Toxicity, type of toxicity and CTC grade

\_\_\_\_\_

- If Other reason, please specify

\_\_\_\_\_

- Progressive disease after maintenance therapy?

- No  
 Yes  
 N/K

- If Progression, first date of imaging confirming progress

\_\_\_\_\_

- Date when clinician decides on clinical progress (in case of no confirming imaging)

\_\_\_\_\_

- Progression confirmed by pathology?  No  
 Yes  
 N/K

- If Yes, biopsy date \_\_\_\_\_

- If Yes, PAD number \_\_\_\_\_

- If Progressive disease, any new metastatic organs?  No  
 Yes  
 N/K

- If new metastatic organ(s), please specify

- T4B
- Regional lymph node (N+)
- Distant metastasis lymph node (M1a)
- Lung
- Liver
- Bone
- Adrenal gland
- Brain
- Pleura
- Peritoneal carcinomatosis
- Soft tissue
- Skin/subcutaneous tissue
- Pancreas
- Intramuscular
- Pericardium
- Other location
- Not known

- If Other location, please specify \_\_\_\_\_

- Therapy within clinical trial  No  
 Yes  
 Not known

- If Yes, trial name and EU-CT or NCT no. \_\_\_\_\_

**Maintenance therapy baseline laboratory**

CRP \_\_\_\_\_

B-leukocyter \_\_\_\_\_

B-Neutrophiles \_\_\_\_\_

B-lymfocytes \_\_\_\_\_

Hb \_\_\_\_\_

|                       |       |
|-----------------------|-------|
| ASAT                  | _____ |
| ALAT                  | _____ |
| ALP                   | _____ |
| P-LD                  | _____ |
| Glukos                | _____ |
| eGFR(cystC), relative | _____ |
| eGFR(krea), relative  | _____ |
| P-Albumin             | _____ |
| Calcium               | _____ |
| Fosfat                | _____ |
| TSH                   | _____ |
| T4                    | _____ |
| T3                    | _____ |
| Troponin T            | _____ |
| proBNP                | _____ |
| Kortisol              | _____ |

**Subsequent treatments**

Any subsequent treatment? If Yes, please go to the Subsequent treatment screen.

- No
- Yes
- Not known

## Subsequent Treatments

This patient has cohort number(s): [baseline\_diagnosti\_arm\_1][kohortnr1],  
[baseline\_diagnosti\_arm\_2][kohortnr2], [baseline\_diagnosti\_arm\_3][kohortnr3],  
[baseline\_diagnosti\_arm\_4][kohortnr4]

Line no.  2  
 3  
 4  
 5  
 6  
 7

Treatment given  EV  
 Gem/Pak  
 Gem/Cis  
 Pembro  
 Saci/Govi  
 Vin  
 Gem  
 Nivo  
 Doc  
 Gem/Carbo  
 HD-MVAC  
 Erdaf  
 Pak  
 Other  
 Not known

If Other, specify \_\_\_\_\_

Performance status  0  
 1  
 2  
 3  
 4  
 N/K

Start date \_\_\_\_\_ Stop date  
(day 1 last cycle)

No. Of cycles \_\_\_\_\_

Best response  CR  
 PR  
 SD  
 PD  
 NE  
 N/K

---

Main reason for stopping

- Planned stop  
 Progressive disease  
 Toxicity  
 Patient's choice  
 Other  
 Not known

---

- If Toxicity, type of toxicity (tox and CTC grade)

---



---

- If Other reason, please specify

---



---

Progressive disease after this treatment line?

- No  
 Yes  
 N/D

---

- If Progressive disease, first date of imaging confirming progress

---



---

- Date when clinician decides on clinical progress (in case of no confirming imaging)

---



---

- Progression confirmed by pathology?

- No  
 Yes  
 N/K

---

- If Yes, biopsy date

---



---

- If Yes, PAD number

---



---

- If progressive disease, any new metastatic organs?

- No  
 Yes  
 N/K

---

- If new metastatic organ(s), please specify

- T4B  
 Regional lymph node (N+)  
 Distant metastasis lymph node (M1a)  
 Lung  
 Liver  
 Bone  
 Adrenal gland  
 Brain  
 Pleura  
 Peritoneal carcinomatosis  
 Soft tissue  
 Skin/subcutaneous tissue  
 Pancreas  
 Intramuscular  
 Pericardium  
 Other location  
 Not known

---

- If Other location, please specify

---

Therapy within clinical trial

- No
- Yes
- N/K

- If Yes, trial name and EU-CT or NCT no.

\_\_\_\_\_

**Baseline laboratory this subsequent therapy**

CRP

\_\_\_\_\_

B-leukocyter

\_\_\_\_\_

B-neutrofiles

\_\_\_\_\_

B-lymfocytes

\_\_\_\_\_

Hb

\_\_\_\_\_

ASAT

\_\_\_\_\_

ALAT

\_\_\_\_\_

ALP

\_\_\_\_\_

P-LD

\_\_\_\_\_

Glukos

\_\_\_\_\_

eGFR(cystC), relative

\_\_\_\_\_

eGFR(krea), relative

\_\_\_\_\_

P-Albumin

\_\_\_\_\_

Calcium

\_\_\_\_\_

Fosfat

\_\_\_\_\_

TSH

\_\_\_\_\_

---

T4

---

---

T3

---

---

Troponin T

---

---

proBNP

---

---

Kortisol

---

# Samples

---

Sampling date

---

---

Sample ID (T0, T1 etc)

---

## Survival Status

---

Status at last follow up at the clinic

- Alive
  - Dead
  - Lost to follow up
- 

-If Alive, last follow up date

\_\_\_\_\_

---

- If Dead, date of death

\_\_\_\_\_

---

- Cancer related death?

- No
- Yes
- Not known
