# Supplementary material
Source: Research Square preprint supplement (doi:10.21203/rs.3.rs-9915229/v1)

# Additional file 2

A

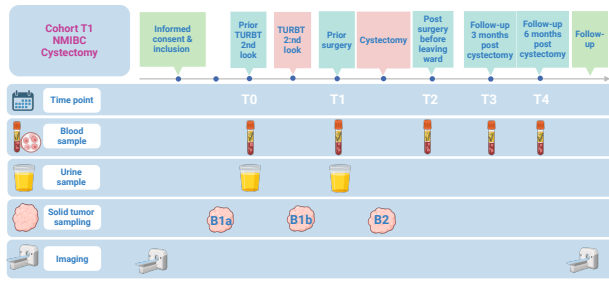

B

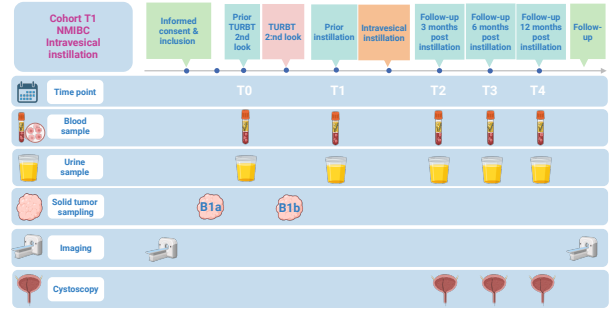

C

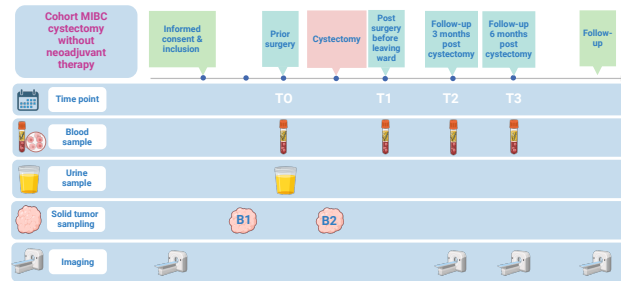

D

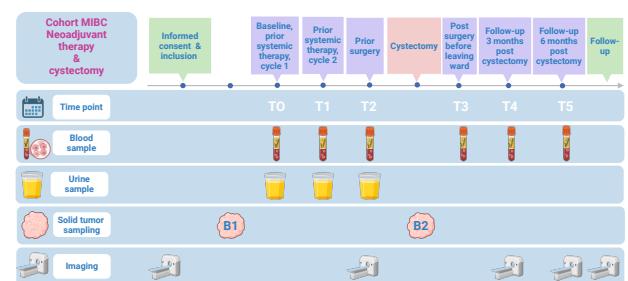

E

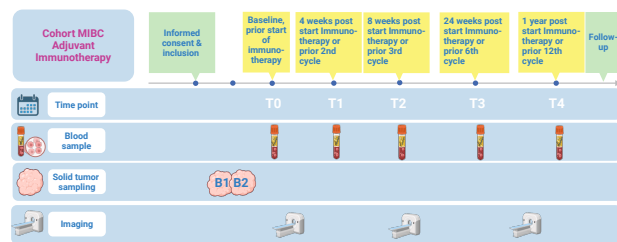

F

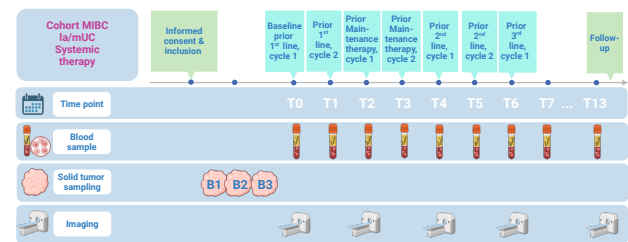

G

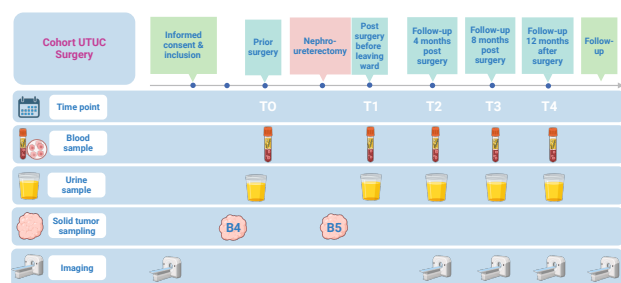

H

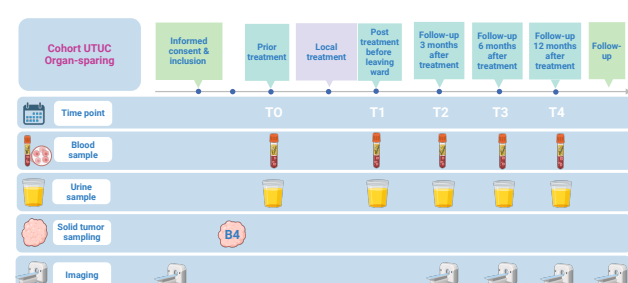

Supplement: Supplementary file 2 [file 3dbd6dc77054f00877ef97b1.pdf]
